# Supplementary material for: The Amino Acid Permease MoGap1 Regulates TOR Activity and Autophagy in Magnaporthe oryzae
Source: MDPI journal article supplement (doi:10.3390/ijms232113663), 2022-11-07
Supplement: s1 [file s1]

# The Amino Acid Permease MoGap1 Regulates TOR Activity and Autophagy in *Magnaporthe oryzae*

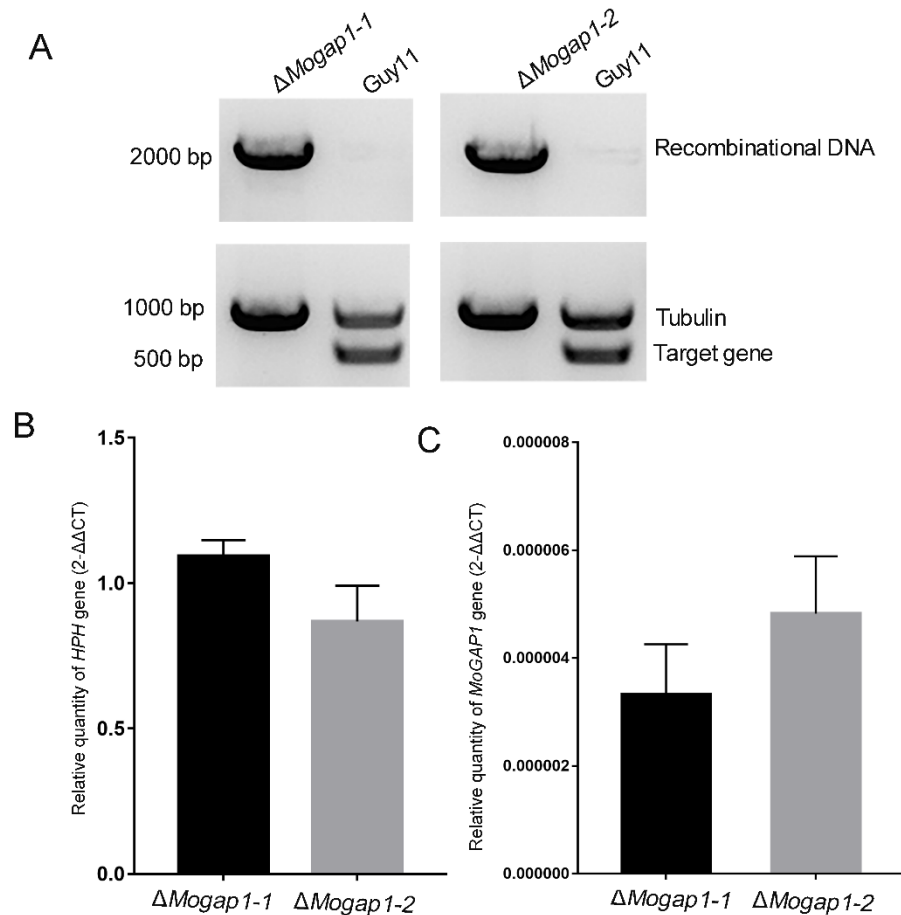

**Figure S1.** The knock-out strategy of *MoGAP1* in *M. oryzae*. **(A)** The recombinational DNA could be detected in the 2000 bp position in  $\Delta$ *Mogap1* mutant while not in the wild-type Guy11 strain. The target gene can be detected in the wild-type Guy11 strain but not in *MoGAP1* deletion mutant. **(B)** The relative expression of *HPH* gene in *MoGAP1* deletion mutant using qPCR. **(C)** The relative expression of *MoGAP1* gene in *MoGAP1* deletion mutant using qPCR.

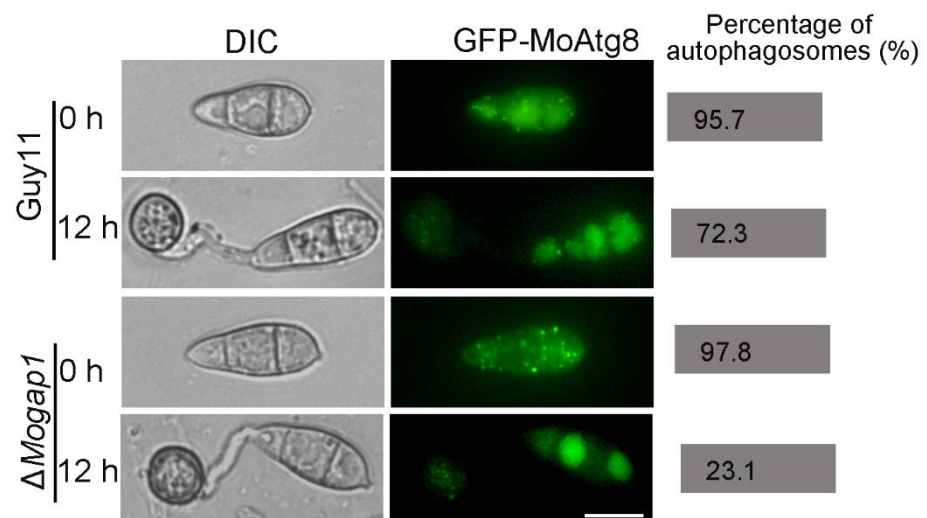

**Figure S2.** The autophagy flux was observed in conidia. The conidia of the wild-type Guy11 and  $\Delta$  *Mogap1* mutant were collected and dropped on glass slide for 0 h and 12 h. Bar = 10  $\mu$ m.
